# Supplementary material
Source: publisher figshare collection journal article supplement (https://acs.figshare.com/ndownloader/files/3914092)
Supplement: Supplementary file 1 [file 3914092]

Supporting Information for

Insertion of Line Defect in Nanoribbons of

Graphene, Boron Nitride and Hybrid of them: An

AIMD study

*Dibyajyoti Ghosh<sup>1</sup>, Prakash Parida<sup>2</sup> and Swapan K Pati<sup>2,3\*</sup>*

Chemistry and Physics of Materials Unit<sup>1</sup>, Theoretical Sciences Unit<sup>2</sup> and New Chemistry Unit<sup>3</sup>, Jawaharlal Nehru Centre for Advanced Scientific Research, Bangalore, 560064, India

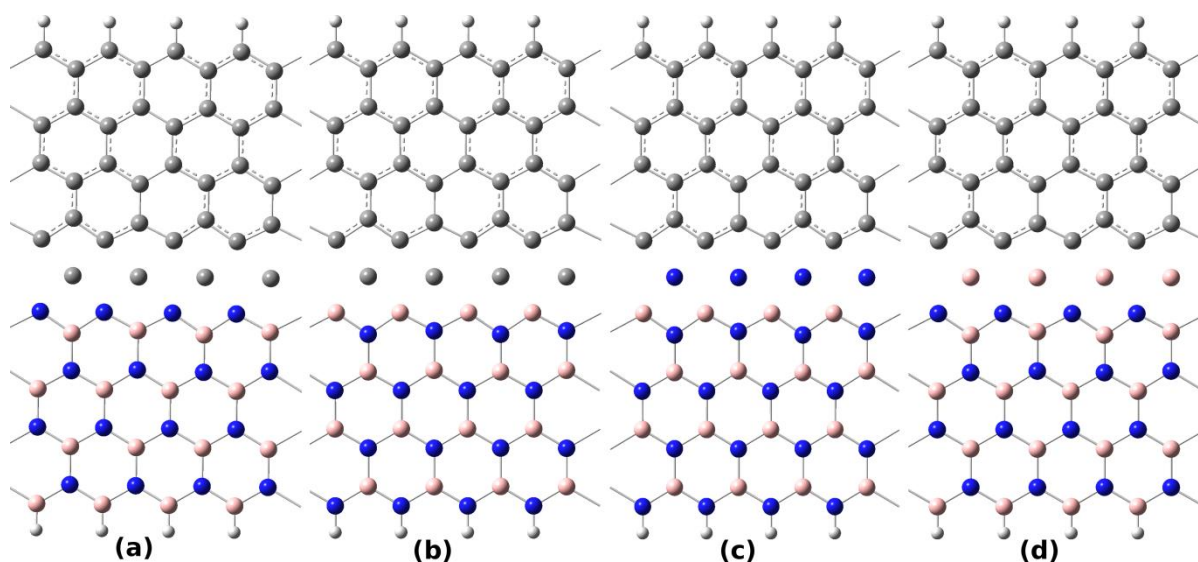

**Figure S1.** Initial structures of (a) C-ZBNCNR-CB, (b) C-ZBNCNR-CN, (c) N-ZBNCNR-CN and (d) B-ZBNCNR-CB.

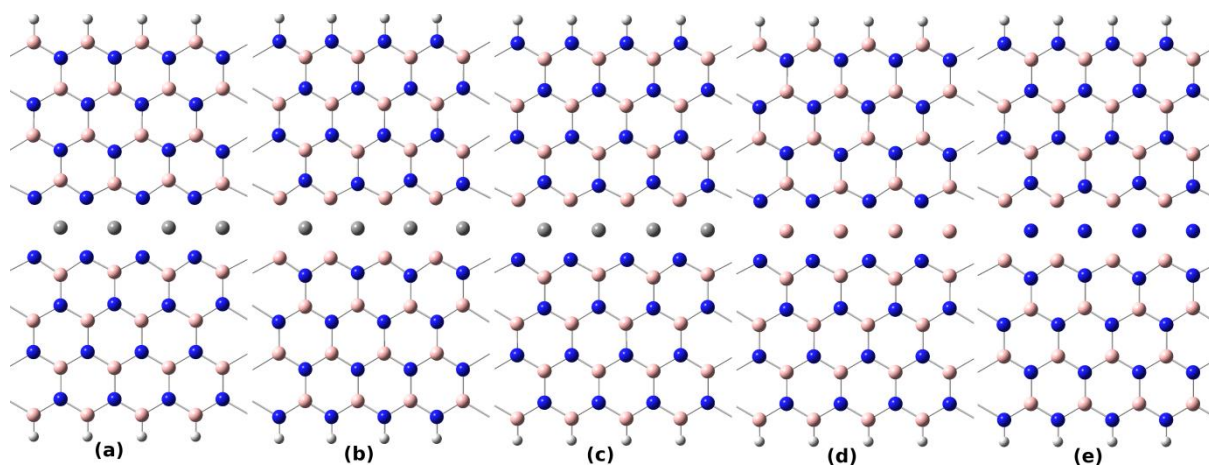

**Figure S2.** Initial structures of (a) C-ZBNNR-BB, (b) C-ZBNNR-NN, (c) C-ZBNNR-BN, (d) B-ZBNNR-BB and (e) N-ZBNNR-NN.

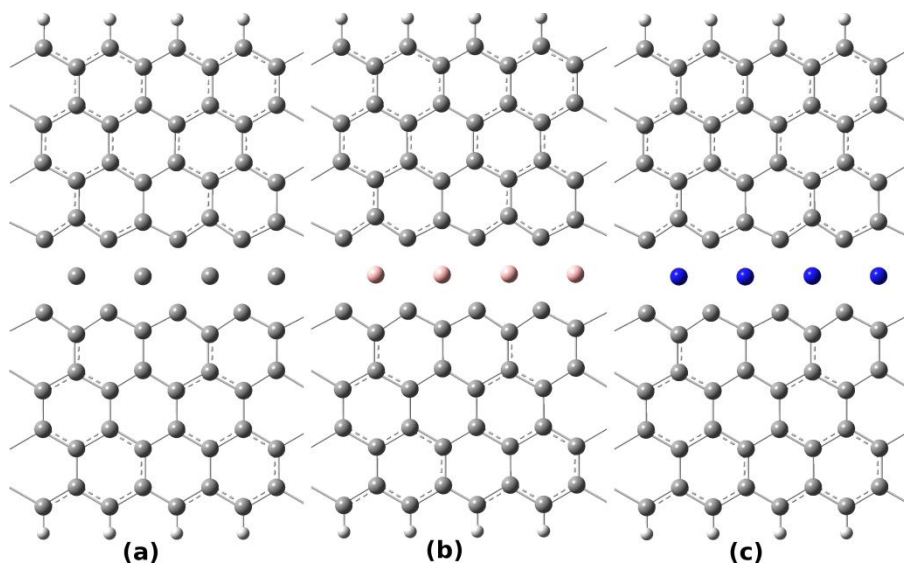

**Figure S3.** Initial structures of (a) C-ZGNR, (b) B-ZGNR and (c) N-ZGNR.

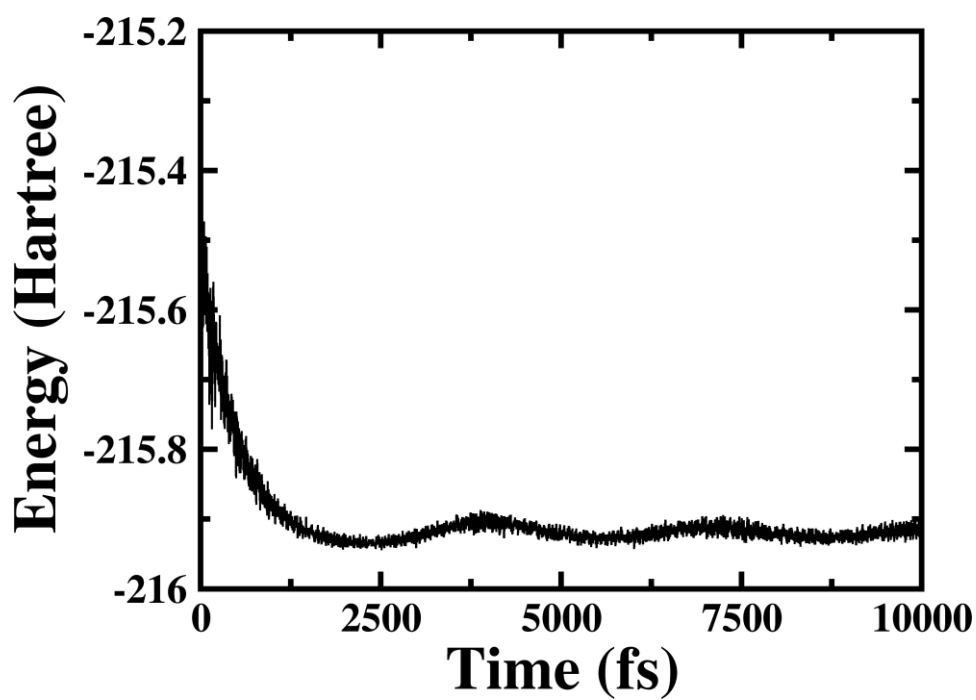

**Figure S4.** Total energy during 10 ps AIMD simulation for reconstruction of N-ZBNCNR-CN with 300 K and 1 atm pressure.

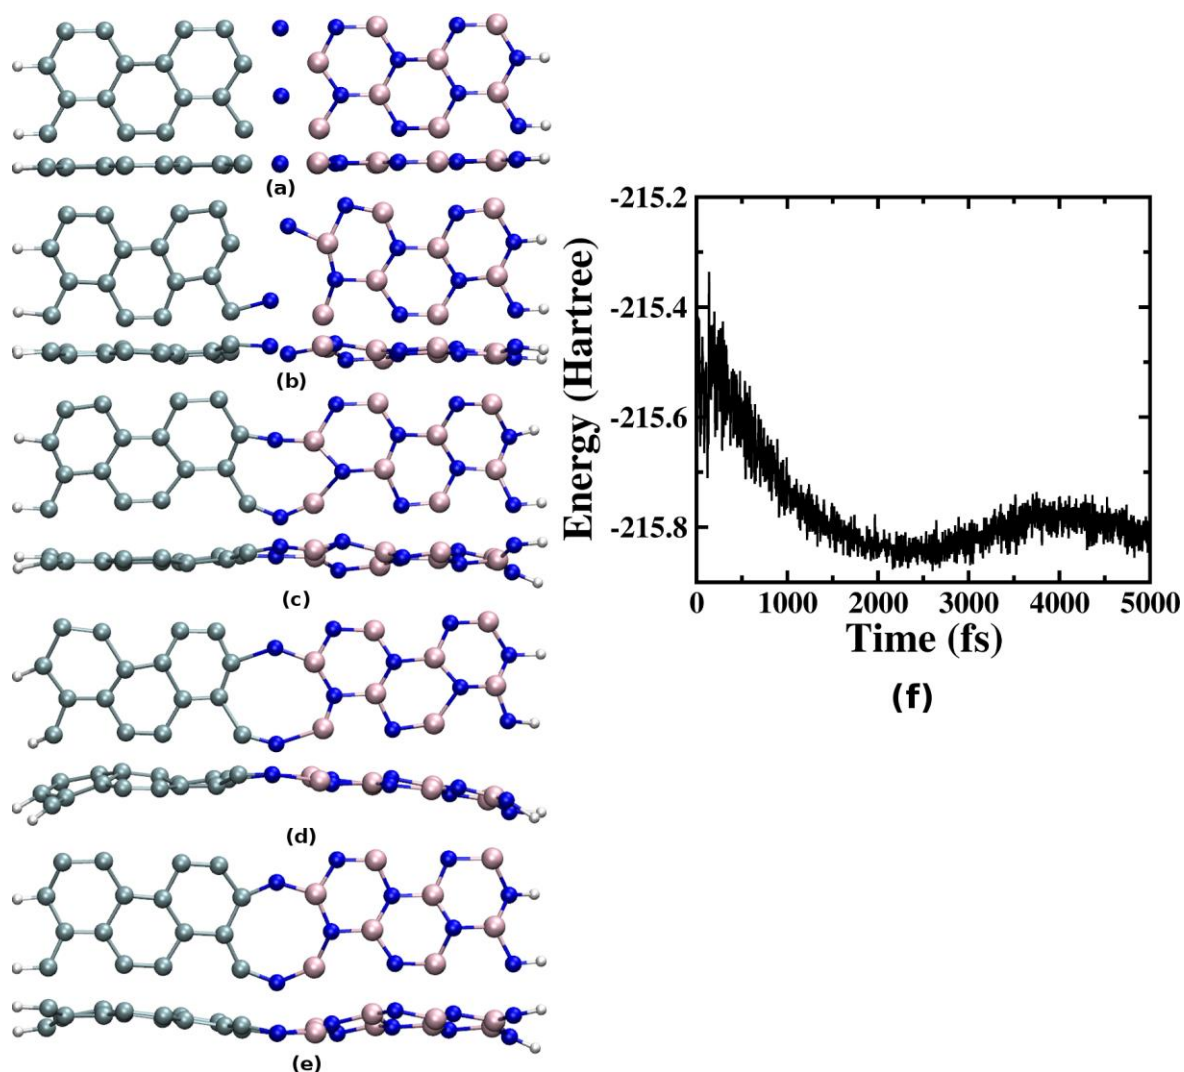

**Figure S5.** Snapshot from top and side of structurally reconstructed N-ZBNCNR-CN at 1000K after (a) 0.0ps (b) 0.005ps (c) 0.01ps (d) 1ps and (e) 5ps. Deposited N atoms at the grain boundary remain mobile initially (a-c). At around 1ps, grain boundary starts getting reconstructed to 5–8–5 ELD by creating N–N dimer at grain boundary (d). The structure remains unchanged up to 5 ps in this structural form (e). Total energy during 5 ps AIMD simulation is shown in (f).

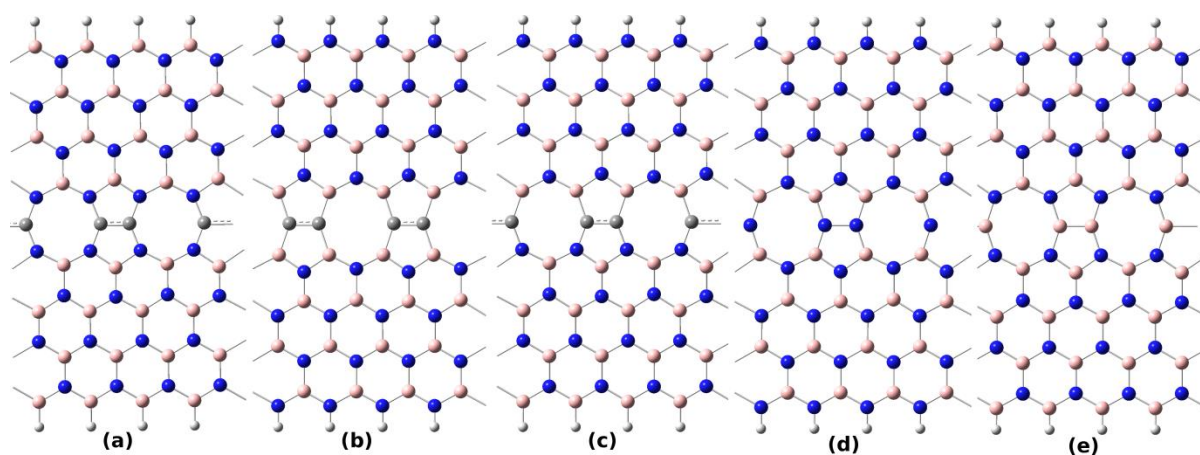

**Figure S6.** Equilibrated structures of (a) C-ZBNNR-BB, (b) C-ZBNNR-NN, (c) C-ZBNNR-BN (d) B-ZBNNR-BB and (e) N-ZBNNR-NN after performing AIMD simulation at 300K for 5ps.

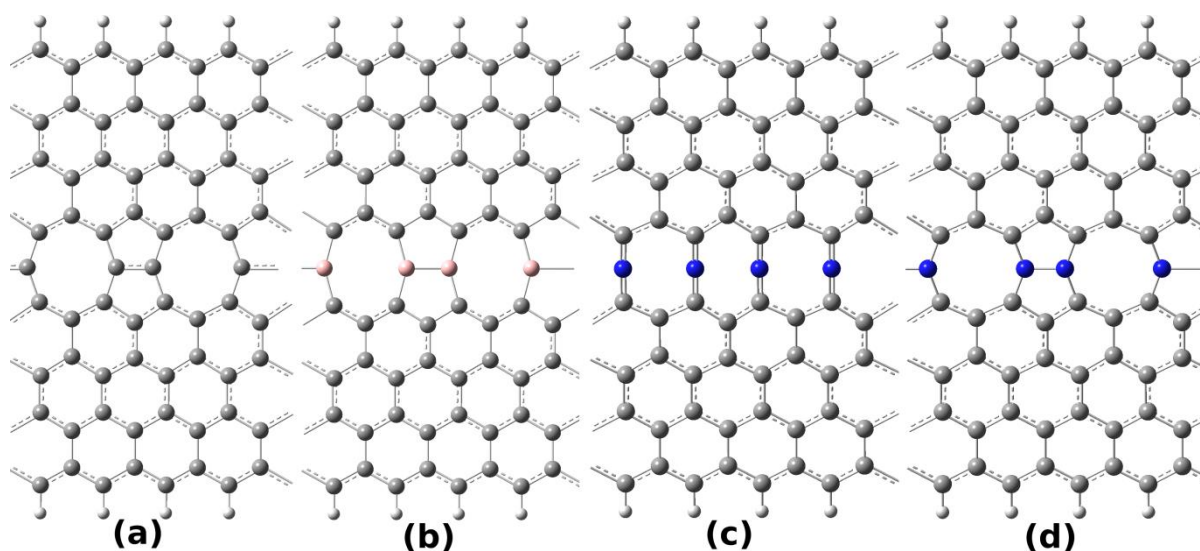

**Figure S7.** Equilibrated structures of (a) C-ZGNR at 300K, (b) B-ZGNR at 300K, (c) N-ZGNR at 300K (d) N-ZGNR at 1000K after performing AIMD simulation for 5ps.

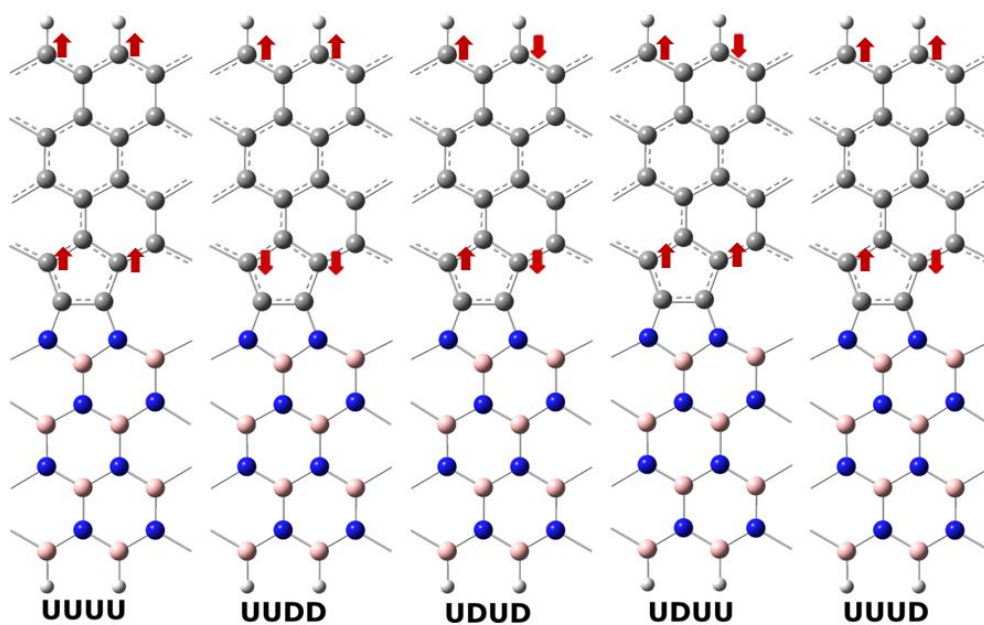

**Figure S8.** Various Spin configurations and their corresponding name for C-ZBNCNR-CB. Up- and down-spins are denoted are U and D, respectively.

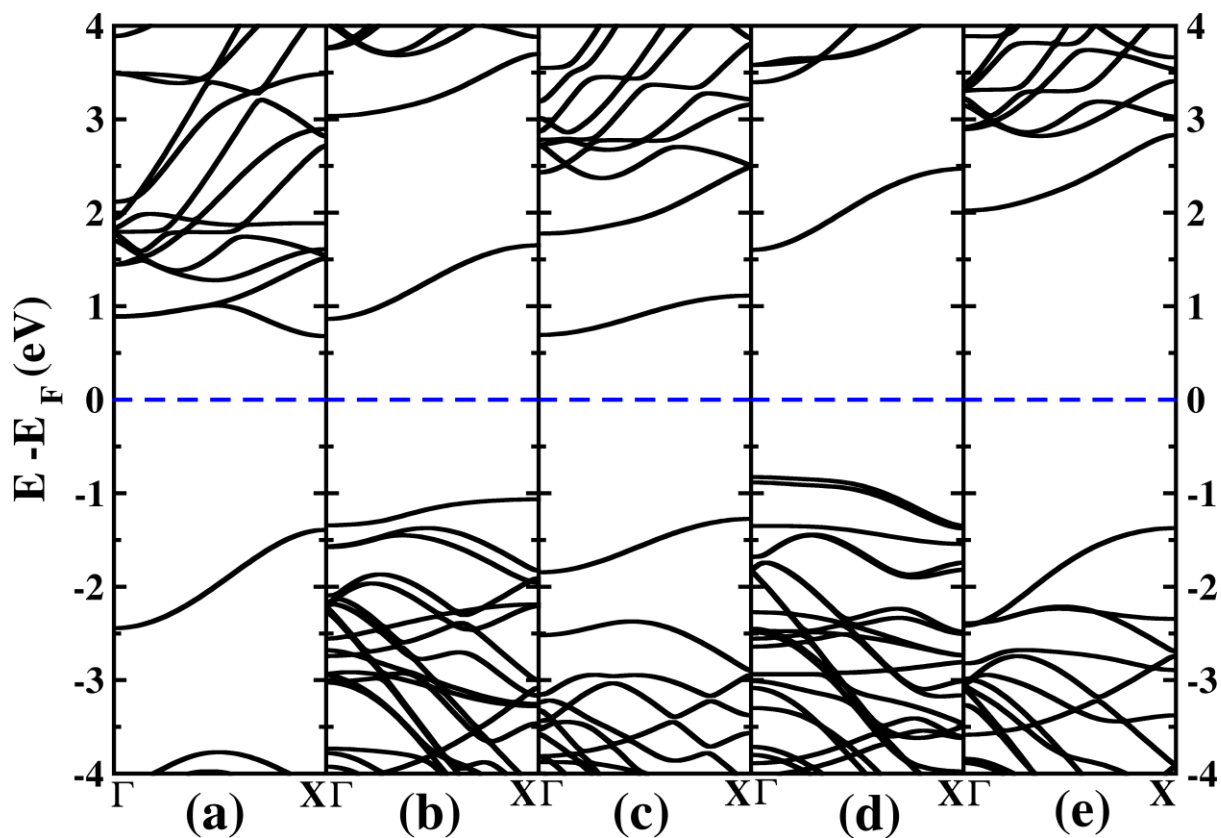

**Figure S9.** Spin polarized band structure of (a) C-ZBNNR-BB, (b) C-ZBNNR-NN, (c) C-ZBNNR-BN (d) B-ZBNNR-BB and (e) N-ZBNNR-NN.

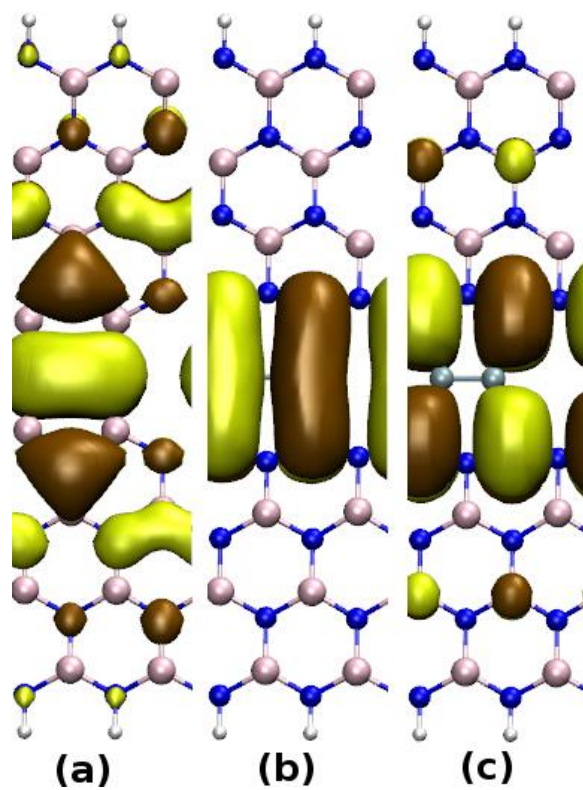

**Figure S10.** Wave function plot of C-ZBNNR-NN for (a) valence band, (b) conduction band and (c) second conduction band at the  $\Gamma$ -point.

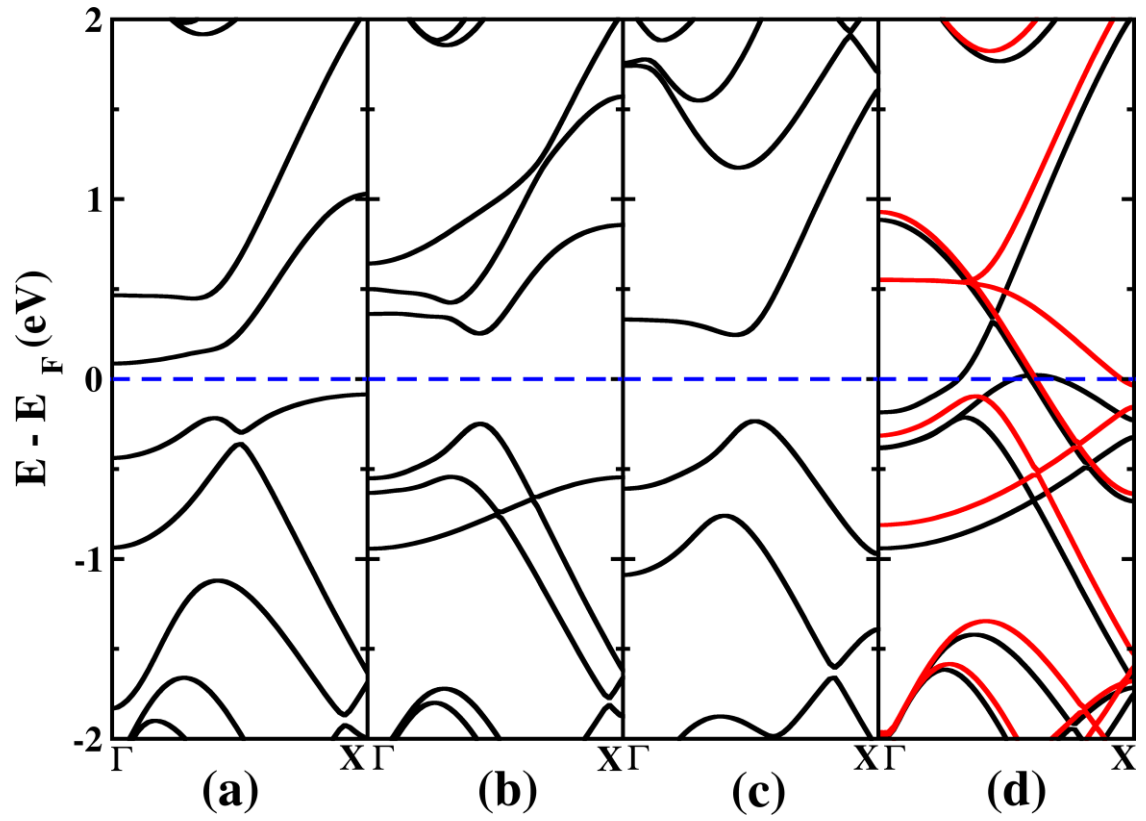

**Figure S11.** Spin polarized band structure of (a) C-ZGNR, (b) B-ZGNR, (c) N-ZGNR, reconstructed at 1000K i.e. contains 5–8–5 ELD and (d) N-ZGNR, reconstructed at 300K i.e. having 8–8–8 ELD at grain boundary.
